# Supplementary material for: Improved isolation of extracellular vesicles by removal of both free proteins and lipoproteins
Source: eLife. 2023 May 30;12:e86394. doi: 10.7554/eLife.86394 (PMC10229111; doi:10.7554/eLife.86394)
Supplement: Figure 1—source data 1. [file elife-86394-fig1-data1.xlsx]

## Sheet: Sheet1
	individual 1		individual 2		individual 3
1/dilution factor	replicate 1	replicate 2	replicate 1	replicate 2	replicate 1	replicate 2
0.0025	122.855	11.3509	39.9984	1.36995	22.9627	2.02908
0.000833	55.7627	4.19982	15.3976	0.298217	9.47135	0.087826
0.000278	20.4106	0.360153	5.84824	0.606378	3.5773	0.059694
9.26e-05	6.71512	0.335734	2.08731	0.05127	1.15392	0.109894
Calibration curve	replicate 1	replicate 2
4000	18.8423	17.8834
800	8.41571	7.93588
160	2.36658	2.27209
32	0.523433	0.504494
6.4	0.125939	0.116761
1.28	0.0392709	0.0346419
0.256	0.0183636	0.0173488
0	0.0141731	0.0131479
Spike and recovery	ApoB_Conc	ApoB_CV	ApoB_SD	spike	recovery (%)
plasma 1200X	26.1785	0.091951	2.40714
100 only	108.167	0.0316743	3.42611
100 spike	116.747	0.0205207	2.39573	100	90.5683
50 only	50.4564	0.026401	1.3321
50 spike	71.585	0.0314751	2.25315	50	90.8131
10 only	9.96781	0.0290362	0.289427
10 spike	34.9004	0.0686544	2.39607	10	87.2194
5 only	5.00585	0.0788635	0.394778
5 spike	30.9159	0.0637404	1.9706	5	94.7493
