# Supplementary material for: Improved isolation of extracellular vesicles by removal of both free proteins and lipoproteins
Source: eLife. 2023 May 30;12:e86394. doi: 10.7554/eLife.86394 (PMC10229111; doi:10.7554/eLife.86394)
Supplement: Figure 2—source data 1. [file elife-86394-fig2-data1.xlsx]

## Sheet: Sheet1
		Albumin				ApoB-100				CD63				CD81				CD9
Day 1		replicate 1	replicate 2	replicate 3	replicate 4	replicate 1	replicate 2	replicate 3	replicate 4	replicate 1	replicate 2	replicate 3	replicate 4	replicate 1	replicate 2	replicate 3	replicate 4	replicate 1	replicate 2	replicate 3	replicate 4
2B	Fraction 7	9.39321	9.39321	9.39321	9.39321	26.9772	26.9772	26.9772	26.9772	2.48817	2.48817	2.48817	14.977	3.58793	3.58793	3.58793	3.58793	0.866791	0.866791	0.866791	0.866791
2B	Fraction 8	9.39321	9.39321	9.39321	9.39321	26.9772	26.9772	26.9772	26.9772	31.0443	32.1396	23.7645	25.5478	380.452	441.214	337.474	364.79	15.8677	16.0793	6.98867	10.436
2B	Fraction 9	9.39321	9.39321	9.39321	9.39321	323.891	371.098	573.511	631.352	293.005	358.777	313.733	339.81	3238.86	3596.07	3523.66	3641.86	146.969	156.563	135.387	173.038
2B	Fraction 10	9.39321	9.39321	9.39321	9.39321	1389.93	1433.61	1766.7	2329.85	858.019	894.696	884.671	909.079	8148.3	8543.46	8629.06	8752.32	372.821	436.666	261.17	311.741
2B	Fraction 11	58.7998	61.9343	70.3472	70.6121	1929	2367.7	2848.91	3138.66	967.745	990.254	845.304	855.646	9830.72	9964.26	9425.89	9770.81	329.448	435.326	253.027	353.612
2B	Fraction 12	212.786	230.195	274.588	276.647	2239.21	2248.21	3206.38	3413.19	690.224	758.381	601.425	685.803	9727.49	10305.3	9593.5	11924.6	251.035	336.361	215.193	294.587
2B	Fraction 13	425.71	442.797	538.53	556.963	2230.39	2614.29	3106.05	4162.62	666.101	695.695	575.333	588.672	9753.72	11091.2	10415.7	12121.2	240.512	282.593	220.044	301.374
2B	Fraction 14	554.409	561.005	495.748	594.788	2168.15	2290.51	2952.95	3676.72	675.687	691.416	635.575	674.782	11290.3	12076.3	10025.1	11869.9	234.552	280.726	216.335	266.059
4B	Fraction 7	9.39321	9.39321	9.39321	9.39321	26.9772	26.9772	26.9772	26.9772	2.48817	2.48817	2.48817	2.48817	3.58793	3.58793	3.58793	15.4514	0.866791	0.866791	0.866791	0.866791
4B	Fraction 8	9.39321	9.39321	9.39321	9.39321	389.569	431.199	1816.87	2096.35	96.7501	112.196	381.519	433.064	1115.2	1159.76	3588.09	3993.03	26.3601	26.9315	112.182	121.758
4B	Fraction 9	9.39321	9.39321	9.39321	9.39321	5725.07	6270.29	10466.3	11648.6	1157.9	1392.45	1513.44	1684.14	13538.7	15285	20070.2	21709.1	399.857	552.173	641.319	774.323
4B	Fraction 10	54.2252	56.944	93.7601	102.935	10213.8	11045.2	15265.6	15361	1530.93	1575.75	1345.66	1408.28	21148.3	23846.2	22673.8	25585.7	862.481	1105.87	878.548	1086.5
4B	Fraction 11	248.817	271.536	368.842	384.873	7031.63	8478.91	12235.3	12805.1	894.734	942.785	859.573	872.325	17176.2	21856.5	19061.2	25369.1	498.389	655.125	534.181	616.684
4B	Fraction 12	865.251	917.092	1044.04	1176.53	5740.07	6291.62	6203.15	6771.34	508.839	530.16	484.141	532.783	12968.1	13260.9	14636.2	16242.2	300.903	341.463	293.643	320.444
4B	Fraction 13	1114.54	1133.74	975.728	999.928	4233.49	5069.34	4069.96	4439.7	385.037	557.25	449.114	526.546	10383.1	12036.6	10131.3	12367.2	190.754	237.122	210.127	244.038
4B	Fraction 14	733.119	749.836	630.776	685.411	2317.75	2688.26	3074.33	3091.98	405.151	471.861	531.159	0	9508	10345	9934.52	11529.5	186.111	194.507	194.234	211.128
6B	Fraction 7	9.39321	9.39321	9.39321	9.39321	26.9772	26.9772	26.9772	26.9772	2.48817	2.48817	2.48817	2.48817	3.58793	16.9059	3.58793	3.58793	0.866791	0.866791	0.866791	0.866791
6B	Fraction 8	9.39321	9.39321	9.39321	9.39321	800.33	814.775	1754.1	2151.04	115.04	121.939	384.775	396.003	1309.64	1324.07	4094.36	4126.37	31.5312	33.7138	99.5615	107.354
6B	Fraction 9	9.39321	9.39321	42.2873	60.9134	13423.7	15100.9	12091.9	13116.5	1114.5	1125.44	1266.68	1273.82	14740.6	16107.8	21300.8	25682.4	832.066	847.798	1107.02	1166.37
6B	Fraction 10	127.29	137.451	168.808	207.855	17114.2	17466.2	13440.4	13726.5	1024.75	1081.39	1020.41	1035.11	24284.4	24544.6	22034.4	22714.6	1625.6	1868.25	1412.41	1786.39
6B	Fraction 11	540.854	694.139	1073.76	1307.42	9538.73	10080.3	7188.56	7463.25	674.64	786.124	792.819	799.267	14857.9	15862.5	14000.1	15957.1	741.835	776.347	572.055	675.365
6B	Fraction 12	2538.89	2980.39	2323.27	3281.86	3829.58	4882.91	2775.15	3357.12	403.26	446.095	376.116	469.288	8471.84	10414.3	9274.02	9389.75	230.526	235.165	209.975	237.287
6B	Fraction 13	1969.52	2088.22	1185.72	1249.66	1569.65	1692.28	1810.13	1960.96	325.987	351.674	308.328	357.818	6466.59		6333.96	6855.45	126.123	137.996	113.375	114.335
6B	Fraction 14	628.844	652.904	579.624	625.061	967.529	1183.48	948.528		294.341	319.05	231.837	298.737	5256.28	6417.12	4942.8	5017.32	107.473	108.746	81.0049	83.543
Day 2		replicate 1	replicate 2	replicate 3	replicate 4	replicate 1	replicate 2	replicate 3	replicate 4	replicate 1	replicate 2	replicate 3	replicate 4	replicate 1	replicate 2	replicate 3	replicate 4	replicate 1	replicate 2	replicate 3	replicate 4
2B	Fraction 7	0.39609	0.39609	0.39609	0.39609	10.5097	10.5097	10.5097	10.5097	7.60183	7.60183	7.60183	7.60183	19.1888	19.1888	19.1888	19.1888	0.158978	0.158978	0.158978	0.158978
2B	Fraction 8	0.39609	1.66926	0.39609	3.12621	76.5445	102.95	10.5097	10.5097	7.60183	7.60183	43.5994	46.0339	190.032	222.465	216.842	226.66	3.69413	4.26883	4.20798	6.26302
2B	Fraction 9	1.61138	2.31747	2.70248	3.01376	1719.34	1809.8	1493.37	1536.04	447.702	476.805	416.097	434.533	4011.88	4129.35	4027.95	4464.02	48.91	52.7947	60.4767	84.0353
2B	Fraction 10	11.9405	12.1416	6.06095	6.17187	5393.08	5800.01	4417.75	4899.87	1028.92	1066.41	959.56	1034.13	8923.7	10417.5	10837.3	10904.3	142.936	143	150.187	206.75
2B	Fraction 11	50.0371	57.617	31.6363	36.3009	7017.22	7582.35	6634.56	6663.21	1083.64	1145.91	1072.45	1088.66	12830.9	13259.8	12474.7	13235.3	146.344	151.719	154.53	185.625
2B	Fraction 12	233.307	242.61	141.239	152.148	8909.7	9051	7380.65	7548.83	1006.61	1036.97	915.463	926.756	11624.4	13414.9	13235.7	13238	120.986	126.791	121.217	147.675
2B	Fraction 13	465.933	469.183	351.773	382.773	7014.26	7419.38	8023.83	8085.12	855.978	859.179	816.015	835.687	11822.8	12702.9	11822.8	12322.1	122.825	127.27	120.491	153
2B	Fraction 14	418.208	421.025	366.18	409.708	5786.45	6896.52	7046.93	7078.83	801.965	827.932	814.066	865.898	10090.8	13101	9999.15	13565.6	121.132	122.07	121.43	129.779
4B	Fraction 7	0.39609	0.39609	0.39609	0.39609	10.5097	10.5097	10.5097	10.5097	7.60183	7.60183	7.60183	47.5307	19.1888	19.1888	19.1888	19.1888	0.158978	0.158978	0.158978	0.158978
4B	Fraction 8	2.72067	2.9539	0.39609	0.39609	2996.26	3213.73	1904.25	1988.64	242.45	252.465	710.986	774.313	1903.01	2153.73	6252.47	6276.11	66.7931	71.076	12.7154	15.0479
4B	Fraction 9	13.6558	18.5331	7.52367	8.87351	13906.9	14151.2	14869.5	15266.7	1624.53	1624.98	2190.85	2283.78	31327.7	31541.9	40576	42972.1	377.95	393.876	205.126	230.12
4B	Fraction 10	52.9124	57.577	36.8181	37.0133	18699.6	18872.7	20933.2	21589.7	1587.54	1717.52	1588.52	1633	37397.8	37914.2	31205.3	34629.1	395.042	402.508	396.525	415.653
4B	Fraction 11	240.482	338.224	210.186	227.614	12093.5	14305.6	13967.2	16496.9	923.664	944.778	805.633	807.403	17573.3		14313.9	16337.3	176.235	178.214	214.483	227.795
4B	Fraction 12	1093.63	1194.07	890.435	910.924	9076.2	9211.61	8507.26	8665.48	699.044	726.007	600.021	652.833	11485.8	11931.8	8563.01	11081.2	94.2609	102.547	115.814	123.407
4B	Fraction 13	895.402	1096.09	958.771	966.375	5606.24	6153.63	5889.85	6227.41	595.207	617.137	495.282	556.06	8745.28	10709.8	7522.19	10018.2	70.0229	77.7517	90.0801	93.5548
4B	Fraction 14	542.864	612.383	643.836	668.734	3870.22	5209.67	4026.73	4400.42	531.999	652.777	424.043	559.207	9569.29	10272.7	7706.16	9403.56	58.8384	61.2737	75.3873	75.6534
6B	Fraction 7	0.39609	0.39609	0.39609	0.39609	10.5097	151.435	10.5097	10.5097	7.60183	7.60183	7.60183	36.504	19.1888	19.1888	19.1888	19.1888	0.158978	0.158978	0.158978	0.158978
6B	Fraction 8	2.93208	3.88941	0.39609	1.76084	6016.81	6365.95	3417.64	3826.61	435.767	454.939	769.626	785.098	4441.9	4533.76	9631.73	9780.34	63.2664	68.0366	31.5533	35.0454
6B	Fraction 9	36.8498	40.9078	25.2664	28.2861	19357.6	20668.9	21182.9	22564.6	1706.33	1753.58	1633.15	1662.05	35565.4	40570.2	39505.8	43261.1	499.421	511.372	480.077	505.904
6B	Fraction 10	173.514	178.92	127.2	154.487	17397.6	17998.3	21587	23908.3	1408.48	1459.76	1538.04	1654.42	37083.9	41425.8	31278	37557.9	600.625	612.755	669.131	704.307
6B	Fraction 11	1070.95	1119.64	845.955	924.874	10061.2	11044	10285.6	12595.8	821.19	961.767	866.182	953.768	14416.6	15788.5	12861.7	13829.3	188.981	193.572	229.534	230.086
6B	Fraction 12	2641.77	2672.74	2663.76	2854.51	5799.25	6570.83	4667.36	5877.46	582.713	606.255	538.026	585.35	6003.73	7791.65	8138.37	8625.62	76.1861	77.2925	89.8921	90.4587
6B	Fraction 13	916.704	1121.02	1337.66	1339.49	3168.15	3334.38	2568.87	3116.15	510.683	525.071	536.722	561.882	5552.12	7107.34	5650.12	7450.87	54.1197	56.3737	56.288	60.1413
6B	Fraction 14	432.34	479.822	495.142	560.139	1827.14	1828.05	1219.01	1585.77	474.868	487.553	430.421	442.697	5891.87	6742.05	3880.46	6447.44	40.1282	46.6738	49.3766	50.4819
