# Supplementary material for: Improved isolation of extracellular vesicles by removal of both free proteins and lipoproteins
Source: eLife. 2023 May 30;12:e86394. doi: 10.7554/eLife.86394 (PMC10229111; doi:10.7554/eLife.86394)
Supplement: Figure 2—source data 2. [file elife-86394-fig2-data2.xlsx]

## Sheet: Sheet1
	Albumin		CD63		CD81		CD9
# of washes	replicate 1	replicate 2	replicate 1	replicate 2	replicate 1	replicate 2	replicate 1	replicate 2
0	74.0644	74.8501	1051.26	1173.55	9993.76	10514.8	118.064	121.998
1	88.7718	95.3195	1713.81	1765.73	17195	17766.7	255.417	256.596
2	103.293	109.095	1801.38	1889.29	16492.9	18284.9	222.493	280.742
3	87.6029	98.3463	1894.4	1906.41	19228.6	19296.2	251.956	291.654
