# Supplementary material for: Improved isolation of extracellular vesicles by removal of both free proteins and lipoproteins
Source: eLife. 2023 May 30;12:e86394. doi: 10.7554/eLife.86394 (PMC10229111; doi:10.7554/eLife.86394)
Supplement: Figure 3—source data 1. [file elife-86394-fig3-data1.xlsx]

## Sheet: Sheet1
	albumin		Apo-100		CD63		CD81		CD9
	replicate 1	replicate 2	replicate 1	replicate 2	replicate 1	replicate 2	replicate 1	replicate 2	replicate 1	replicate 2
DGC F1	11025	10311.3	1887.37	1773.59	10.5396	10.5396	136.46	113.002	104.468	72.5685
DGC F2	17584.2	16956.2	815.604	805.514	12.4534	9.87869	147.122	123.431	44.2331	22.2417
DGC F3	18834.5	18380.2	322.24	318.698	18.7063	16.7678	170.02	166.244	29.7695	29.7695
DGC F4	20971.8	15728.7	219.588	191.409	12.8329	11.7401	126.187	115.638	29.7695	29.7695
DGC F5	11499.7	9907.43	261.469	242.072	11.8095	9.47733	155.85	147.11	29.7695	29.7695
DGC F6	8422.63	8242.04	253.177	245.158	10.5396	10.5396	175.754	174.897	29.7695	29.7695
DGC F7	6545.24		157.951	148.687	10.5396	10.5396	300.111	243.333	77.6308	61.2106
DGC F8	2924.9		105.011	101.876	10.5396	10.5396	196.155	186.18	122.216	112.537
DGC F9	1200.3		56.5645	55.3559	10.5396	10.5396	171.87	164.618	70.2454	55.9204
DGC F10	1489.85		23.6777	20.2252	70.9911	57.62	5284.06	4727.94	12431.7	12059.1
DGC F11	2983.18		11.5565	11.035	18.4758	11.968	717.647	534.97	2595.94	2092.55
SEC	84.9319	76.3758	17279.6	16712.7	77.8009	75.0461	8934.49	8315.46	7239.71	7224.3
DGC SEC	1.63981	1.63981	10.8173	10.8173	10.5396	10.5396	562.405	531.856	506.655	418.281
