# Supplementary material for: Improved isolation of extracellular vesicles by removal of both free proteins and lipoproteins
Source: eLife. 2023 May 30;12:e86394. doi: 10.7554/eLife.86394 (PMC10229111; doi:10.7554/eLife.86394)
Supplement: Figure 4—source data 1. [file elife-86394-fig4-data1.xlsx]

## Sheet: Sheet1
	Albumin		ApoB-100	CD63		CD81		CD9
	replicate 1	replicate 2	replicate 1	replicate 1	replicate 2	replicate 1	replicate 2	replicate 1	replicate 2
1mL 2:1	32.7838		360.411	1199.48	1401.69	26748.3	29692	204.18	204.256
1mL 1:2	8.48834	8.94381	212.451	1069.45	1207.62	10756.3	11175.8	137.416	149.373
1mL 4:1	27.7113	30.9988	231.258	1219.1	1250.31	25329.4	25609.2	155.808	175.291
1mL 1:4	12.2634	12.4382	827.662	3408.63	3627.52	16123	18950.4	394.073	406.367
2mL 2:1	5.89671	17.5243	134.38	802.932	814.617	16050.5	17227.5	98.8584	103.533
2mL 1:2	5.62609		102.624	664.547	668.897	9247.38	9703.33	75.5199	76.4659
2mL 4:1	16.9997	17.0701	101.8	743.005	806.047	14100.1	14199.4	79.5977	91.367
2mL 1:4	0.784708	5.83412	56.9596	801.539	801.766	6939.63	7790.58	75.7806	76.53
4mL 2:1	7.29934		27.1909	436.735	465.063	7495.35	7626.35	43.1447	50.7815
4mL 1:2	0.784708	0.784708	5.94426	252.542	326.734	3363.75	3369.72	22.3245	23.1317
4mL 4:1	26.8001	35.8582	71.8518	557.123	621.021	10364.1	10789.8	70.3271	76.1062
4mL 1:4	0.784708	0.784708	5.94426	233.296	248.605	2394.94	2555.04	10.8134	19.4536
