# Supplementary material for: Improved isolation of extracellular vesicles by removal of both free proteins and lipoproteins
Source: eLife. 2023 May 30;12:e86394. doi: 10.7554/eLife.86394 (PMC10229111; doi:10.7554/eLife.86394)
Supplement: Figure 4—source data 2. [file elife-86394-fig4-data2.xlsx]

## Sheet: Sheet1
	Albumin				Apo				CD63				CD81				CD9
	0mL		2mL		0mL		2mL		0mL		2mL		0mL		2mL		0mL		2mL
	replicate 1	replicate 2	replicate 1	replicate 2	replicate 1	replicate 2	replicate 1	replicate 2	replicate 1	replicate 2	replicate 1	replicate 2	replicate 1	replicate 2	replicate 1	replicate 2	replicate 1	replicate 2	replicate 1	replicate 2
7	0.221415	0.221415			52.9404	52.9404			0	9.62478			1.0304	11.9504			0mL		2mL
8	6.00951	8.17413			534.283	584.72			283.851	332.649			3400.46	3531.15			2.60526	2.60526
9	41.4696	48.2115	0.221415	0.221415	2512.75	2972.71	52.9404	52.9404	1107.65		3.30497	19.1981	17695.4	18595.5	514.384	531.868	357.175	376.567
10	232.26	237.897	11.3615	11.5351	3179.54	3350.98	52.9404	53.47	1028.01	1072.2	311.505	321.184	13269.4	13673.9	10881	10957.7	2545.33	2944.24	4.987	5.49456
11			63.814	63.93			95.89	99.079			541.374	580.657			23377.1	24156.6	2550.39	2976.4	220.7	234.168
12			518.083	531.036			288.275	307.899			316.366	363.932			16366.1	17315.4			426.802	467.555
13			2781.76	2991.32			288.608	295.415			168.455	182.631			6826.62	6832.58			244.116	262.416
14			2804.57	2908.22			216.517	0			149.859	150.137			4355.55	0			76.5851	82.8145
15																			43.3563	48.3165
