# Supplementary material for: Improved isolation of extracellular vesicles by removal of both free proteins and lipoproteins
Source: eLife. 2023 May 30;12:e86394. doi: 10.7554/eLife.86394 (PMC10229111; doi:10.7554/eLife.86394)
Supplement: Figure 4—source data 3. [file elife-86394-fig4-data3.xlsx]

## Sheet: Sheet1
	Albumin				ApoB-100				CD63				CD81				CD9
Day 1	replicate 1	replicate 2	replicate 3	replicate 4	replicate 1	replicate 2	replicate 3	replicate 4	replicate 1	replicate 2	replicate 3	replicate 4	replicate 1	replicate 2	replicate 3	replicate 4	replicate 1	replicate 2	replicate 3	replicate 4
SEC	169.455	181.198	184.107	202.689	2828.23	2849	2746.63	2837.74	299.346	308.187	330.612	334.281	10676.9	11687.5	9625.93	11391.8	1269.09		1319.63	1326.76
DMC	170.83	185.239	181.007	185.966	1169.8	1194.17	857.773	966.179	161.526	167.274	145.18	193.08	15863.4	16423.4	15091	17660.7	451.403	471.516	438.057	461.482
TMC	36.9893	39.1288	36.3536		368.128	406.788	343.033	368.143	99.0565	108.141	96.3715	97.8188	9222.39	9954.19	9250.44	9780.46	391.915		364.333	406.763
Day 2	replicate 1	replicate 2	replicate 3	replicate 4	replicate 1	replicate 2	replicate 3	replicate 4	replicate 1	replicate 2	replicate 3	replicate 4	replicate 1	replicate 2	replicate 3	replicate 4	replicate 1	replicate 2	replicate 3	replicate 4
SEC	147.658	157.534	157.454	187.676	711.889	779.402	724.897	843.939	301.707	304.37	349.273	376.168	13422	13838.2	14194.4	15012.5	31.7906	32.3651	33.0945	34.7646
DMC	115.68	121.674	124.739	128.038	176.458	193.455	170.222	184.939	130.773	147.904	130.025	152.933	19550.7	23109.3	20995.1	21659.6	16.0831	17.6108	16.119	16.2635
TMC	20.6882	26.8218	20.9291	21.8217	57.5961	66.9452	64.4487	68.3861	78.977	93.0311	85.984	99.8605	9017.16	9462.29	10112.2	10349.6	12.5234	12.651	10.5439	11.6595
