# Supplementary material for: Improved isolation of extracellular vesicles by removal of both free proteins and lipoproteins
Source: eLife. 2023 May 30;12:e86394. doi: 10.7554/eLife.86394 (PMC10229111; doi:10.7554/eLife.86394)
Supplement: Figure 5—source data 1. [file elife-86394-fig5-data1.xlsx]

## Sheet: Sheet1
	Albumin		Apo-100		CD63		CD81		CD9
	replicate 1	replicate 2	replicate 1	replicate 2	replicate 1	replicate 2	replicate 1	replicate 2	replicate 1	replicate 2
Manual - 1	147.042	155.54	2073.97	2329.26	100.291	113.435	8141.92	9053.72	18.0756	18.2575
Manual - 2	124.404	134.618	1984.02	2233.27	102.602	145.078	7951.5	8521.95	15.0481	17.7449
Manual - 3	112.679	121.776	2259.2	2461.05	117.328	125.172	7700.81	8276.33	16.41	17.6348
Manual - 4	202.833	217.075	2292.31	2383.96	122.304	149.388	8212.14	8640.52	17.6774	19.3274
Manual - 5	154.855	165.526	2001.62	2524.18	104.785	129.565	8483.32	8661.84	17.6487	20.4606
Manual - 6	175.333	206.207	2094.99	2408.11	130.983	151.356	8066.35	8327.58	17.911	19.2789
Manual - 7	111.658	119.674	2391.78	2463.84	118.105	122.946	7383.83	7928.17	16.58	17.4558
Manual - 8	102.118	111.982	2063.92	2161.36	91.7361	104.534	7622.61	7681.96	15.1787	16.6157
Automated - 1	150.737	155.966	2214.47	2288.54	96.5963	121.593	8392.59	8883.89	19.1221	19.3272
Automated - 2	159.024	165.505	1939.13	2092.35	104.073	125.616	8402.09	8985.95	16.5446	18.3201
Automated - 3	185.873	192.963	1952.62	2004.86	123.945	127.203	8274.93	8296.3	17.9061	19.2473
Automated - 4	208.493	215.002	1874.22	2302.13	115.31	146.131	8927.83	9474.14	18.0714	18.7174
Automated - 5	161.804	173.441	2134.59	2538.1	123.363	131.735	8745.1	9214.4	18.0858	18.4966
Automated - 6	220.111	246.357	2451.32	2481.12	124.761	137.16	9282.32	9509.34	17.3377	17.4319
Automated - 7	157.988	162.204	2331.87	2341.41	83.4252	107.104	8437.8	8683.88	16.8338	17.7049
Automated - 8	206.509	223.202			120.187	160.673	10119.1	10407.1	19.1667	20.7357
